# Supplementary material for: Direct conversion of esters, lactones, and carboxylic acids to oxazolines catalyzed by a tetranuclear zinc cluster
Source: Royal Society of Chemistry journal article supplement (doi:10.1039/b605066b), 2006-01-01
Supplement: b605066b.pdf [file b605066b.pdf]

## Electronic Supplementary Information (ESI)

### Direct Conversion of Esters, Lactones, and Carboxylic Acids to Oxazolines Catalyzed by Tetranuclear Zinc Cluster

Takashi Ohshima,\* Takanori Iwasaki, and Kazushi Mashima\*

*Department of Chemistry, Graduate School of Engineering Science, Osaka University,  
Toyonaka, Osaka 560-8531, Japan*

#### Preparation of Tetranuclear Zinc Cluster **1b**:

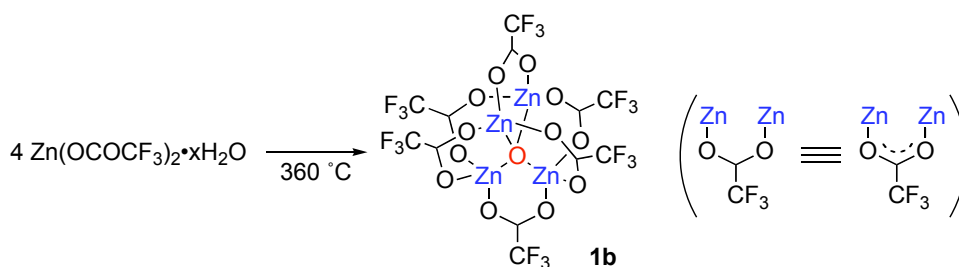

Under an inert atmosphere of argon, zinc trifluoroacetate hydrate (845 mg, 2.73 mmol as a monohydrate) was heated at 120 °C for 4 h under reduced pressure ( $\leq 0.02$  mmHg) to remove water. The resulting dry powder was then heated at 360 °C on a sand bath, and  $\mu$ -oxo-tetranuclear zinc cluster **1b** was sublimed from the reaction mixture. The zinc cluster was collected and stored under an inert atmosphere of argon (545 mg, 84%).

White solid; IR (nujol NaCl,  $\nu$ ) 2923, 1701, 1202, 856, 796, 730  $\text{cm}^{-1}$ ;  $^{13}\text{C}$  NMR (75 MHz, THF- $d_8$ , 35 °C)  $\delta$  163.81 (q,  $J_{\text{C-F}} = 38$  Hz,  $\text{CF}_3\text{COO}$ ) 116.97 (q,  $J_{\text{C-F}} = 288$  Hz,  $\text{CF}_3\text{COO}$ );  $^{19}\text{F}$  NMR (282 MHz, THF- $d_8$ , 35 °C)  $\delta$  -78.88 (s); Anal. calcd for  $\text{C}_{12}\text{F}_{18}\text{O}_{13}\text{Zn}_4$ : C 15.08%; found C 15.52%.

**$^{13}\text{C}$  NMR of  $\mu$ -oxo-tetranuclear zinc cluster 1b in THF- $d_8$ :**

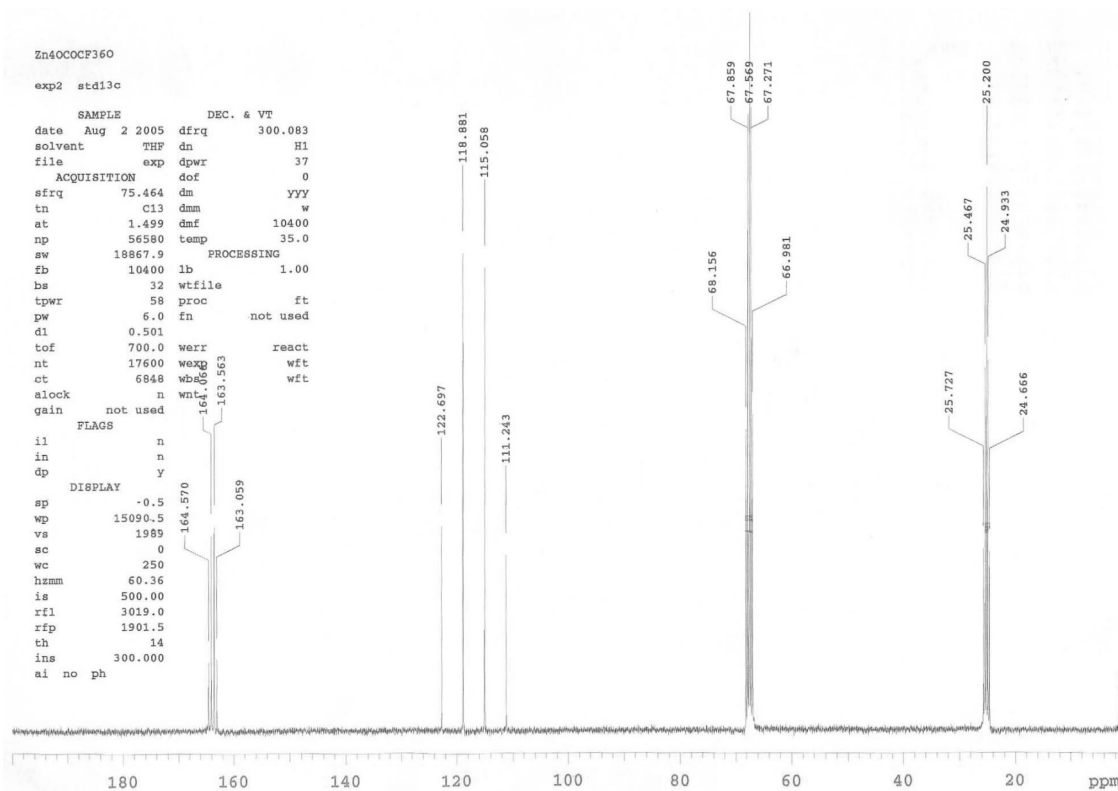

**$^{19}\text{F}$  NMR of  $\mu$ -oxo-tetranuclear zinc cluster 1b in THF- $d_8$ :**

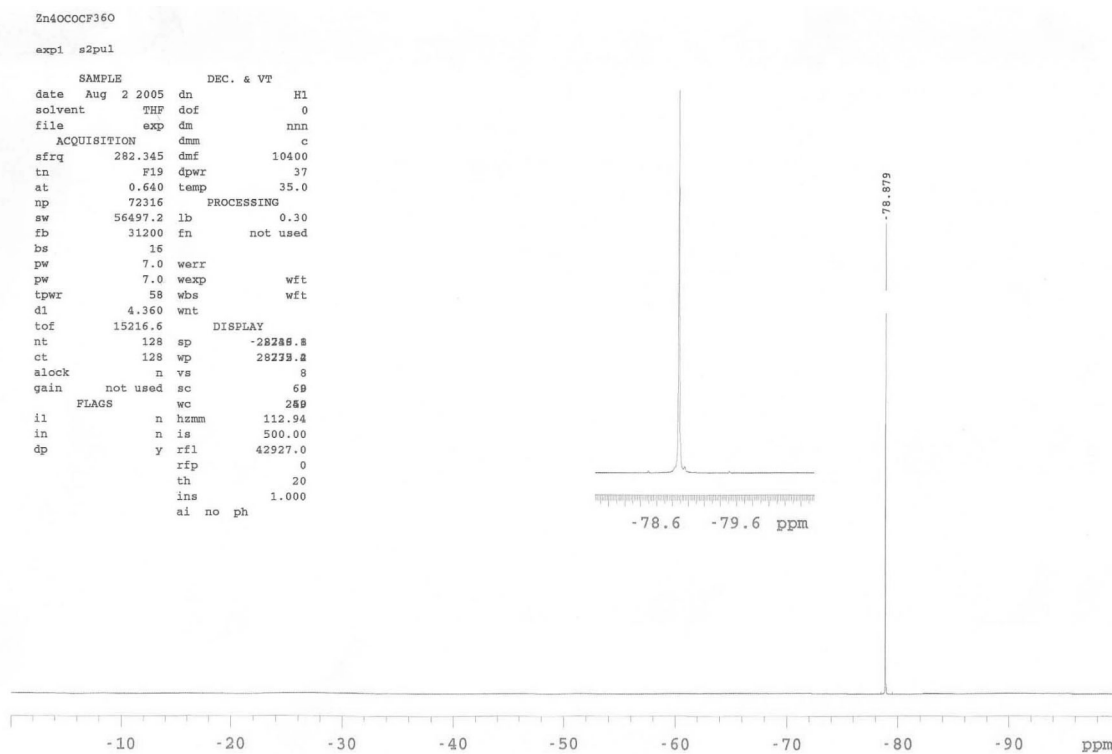

## ESI-MS analysis of $\mu$ -oxo-tetranuclear zinc cluster **1b** in MeOH:

ESI-MS analysis on JEOL JMS-700

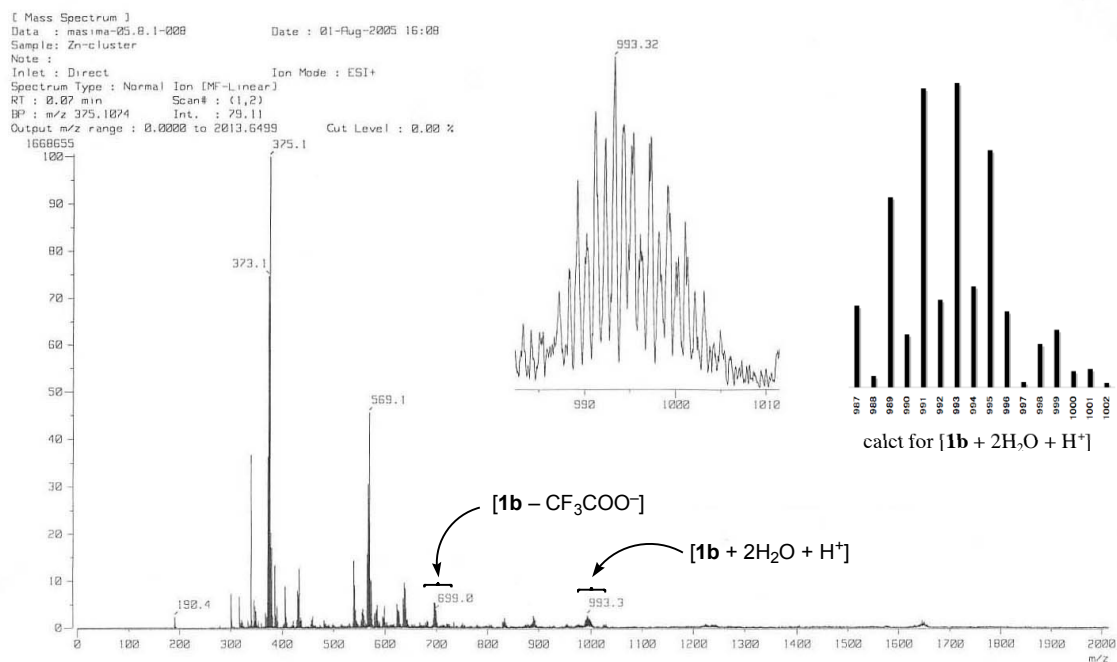

ESI-MS analysis on Waters micromass ZQ with Waters 2695 Separation Module

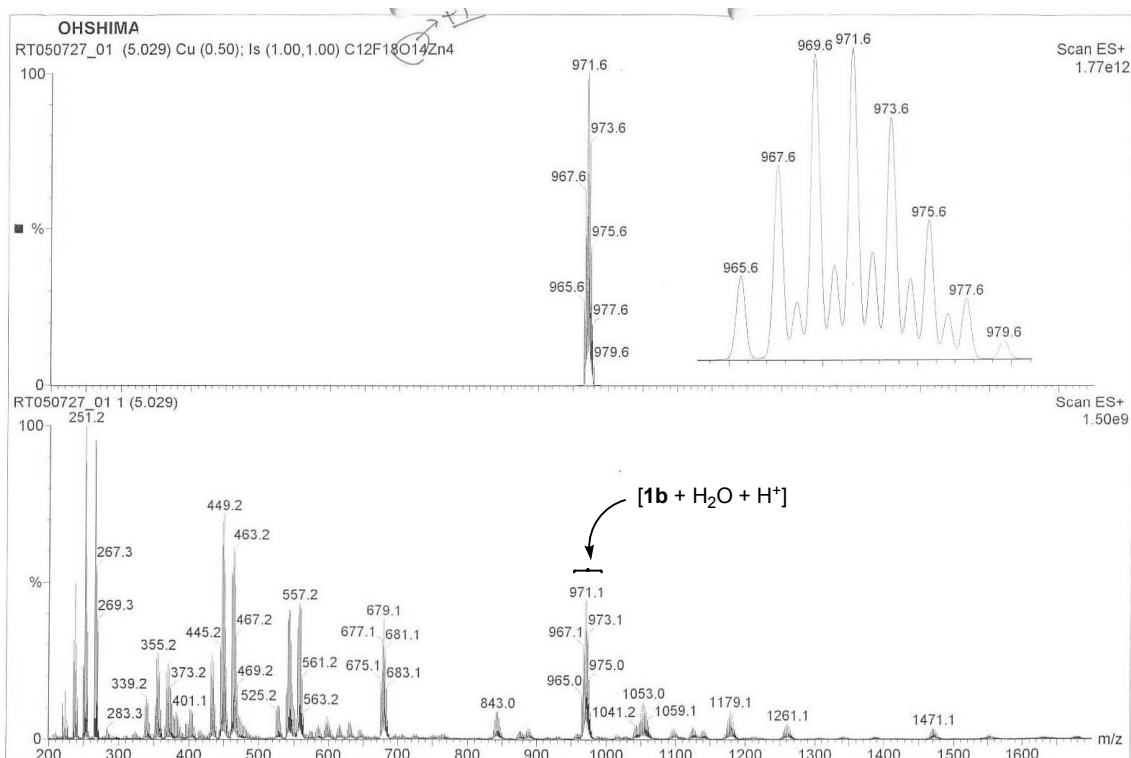

## Control Reaction Using the Hydroxyamide Intermediate **15ja**:

**Table S-1**

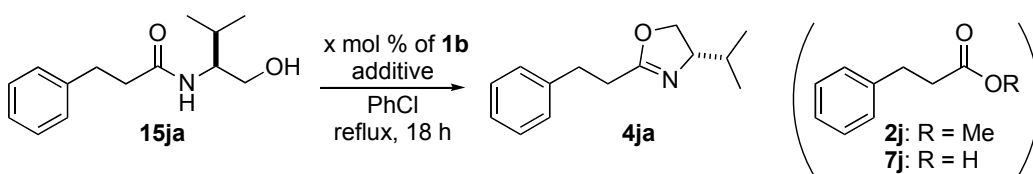

| Entry | <b>1b</b> (x mol %) | Additive                                                                   | Yield of <b>4ja</b> (%) <sup>a</sup> | Comments                                          |
|-------|---------------------|----------------------------------------------------------------------------|--------------------------------------|---------------------------------------------------|
| 1     | none                | none                                                                       | 3                                    |                                                   |
| 2     | 1.25                | none                                                                       | 97                                   |                                                   |
| 3     | 1.25                | MeOH (10 equiv to <b>15ja</b> )<br>(400 equiv to <b>1b</b> )               | 96                                   |                                                   |
| 4     | 1.25                | H <sub>2</sub> O (10 equiv to <b>15ja</b> )<br>(400 equiv to <b>1b</b> )   | 85                                   |                                                   |
| 5     | 1.25                | MeOH (100 equiv to <b>15ja</b> )<br>(4000 equiv to <b>1b</b> )             | 36                                   | <b>2j</b> was obtained in 16% yield. <sup>a</sup> |
| 6     | 1.25                | H <sub>2</sub> O (100 equiv to <b>15ja</b> )<br>(4000 equiv to <b>1b</b> ) | 20                                   | <b>7j</b> was obtained in 4% yield. <sup>a</sup>  |

<sup>a</sup> Determined by GC analysis of the crude sample.

(i) Based on the results of Entry 1 in Table 1 and Entry 1 in Table S-1, Zn cluster **1b** is essential for not only the condensation reaction but also cyclodehydration reaction.

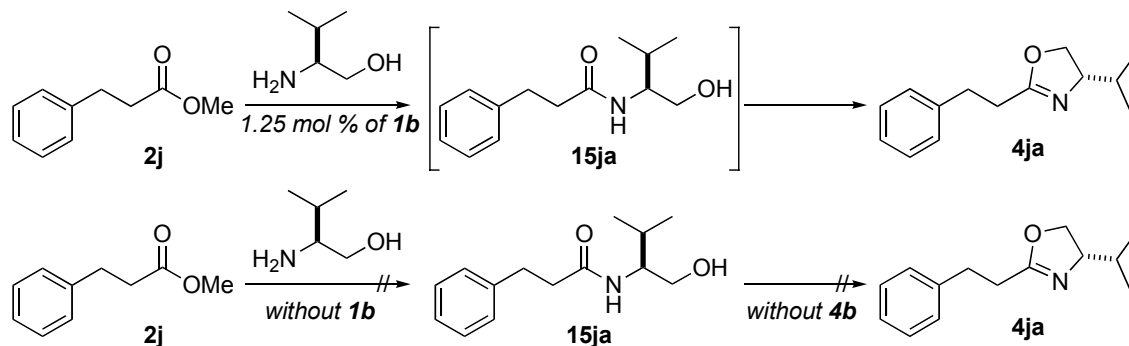

(ii) Based on the results of Entries 2 to 4 in Table S-1, Zn cluster **1b** showed comparable catalyst activity even in the presence of 400 equivalents of water or methanol.

(iii) Based on the results of entries 5 and 6 in Table S-1, in the presence of excess water or methanol (100 equiv to **15ja** = 4000 equiv to **1b**), Zn cluster **1b** promoted hydrolysis or amide esterification.

## Experimental Procedures and Characterization of the Products

**General:** Nuclear magnetic resonance ( $^1\text{H}$  NMR,  $^{13}\text{C}$  NMR, and  $^{19}\text{F}$  NMR) spectra were measured on a Varian MERCURY300-C/H spectrometer operating at 300 MHz ( $^1\text{H}$  NMR), 75 MHz ( $^{13}\text{C}$  NMR), and 282 MHz ( $^{19}\text{F}$  NMR), in 5 mm NMR tubes. All  $^1\text{H}$  NMR chemical shifts were reported in ppm relative to internal references of TMS at  $\delta$  0.00. All  $^{13}\text{C}$  NMR chemical shifts were reported in ppm relative to carbon resonance in chloroform- $d_1$  at  $\delta$  77.00, THF- $d_8$  at  $\delta$  25.20. The  $^{19}\text{F}$  NMR chemical shifts were reported in ppm relative to external references of  $\alpha,\alpha,\alpha$ -trifluorotoluene at  $\delta$  -63.9. Low and high resolution mass spectra (EI, FAB) were measured on JEOL JMS-700. ESI mass spectra were measured on JEOL JMS-700 coupled with an electrospray ionization probe (MS-ESIP15) and Waters micromass ZQ with Waters 2695 Separation Module. IR spectra were recorded on Jasco FT/IR-230 spectrometer and Jasco FT/IR-410 spectrometer. Elemental analyses were conducted by Perkin-Elmer 2400II. Melting points of air- and moisture-sensitive compounds were measured using Yanaco micro melting point apparatus. All manipulations involving air- and moisture-sensitive compounds were carried out using the standard Schlenk techniques under an argon atmosphere. Chlorobenzene was distilled from calcium hydride. (*S*)-Valinol, (*R*)-phenylglycinol, and (*S*)-phenylalaninol were prepared according to the literature procedures.<sup>SI-1</sup>  $\alpha,\alpha$ -Disubstituted aminoalcohol **3g** was prepared from (*S*)-phenylalanine methyl ester hydrochloride with methyl magnesium iodide.<sup>SI-2</sup> Ester substrates were synthesized from the corresponding carboxylic acids by standard esterification reaction with catalytic amounts of an acid ( $\text{SOCl}_2$ ,  $\text{H}_2\text{SO}_4$ , or *p*-toluenesulfonic acid).

**General procedure for the catalytic tandem condensation–cyclodehydration reaction of esters, lactones, and carboxylic acids.** Catalyst **1b** (0.0375 mmol = 0.15 mmol on metal), substrate (3.0 mmol), and aminoalcohol (3.6 mmol) in chlorobenzene (5 mL) were refluxed for periodic time under an argon atmosphere. The resulting mixture was concentrated *in vacuo* and purified by silica gel column chromatography.

### (*S*)-4-Isopropyl-2-phenyloxazoline (**4aa**)<sup>SI-3</sup>

Purified by flush column chromatography (silica gel, Hexane/EtOAc = 8/1); colorless oil; IR (neat NaCl,  $\nu$ ) 1652, 1450, 1354, 1081, 1065, 1026, 968, 694  $\text{cm}^{-1}$ ;  $^1\text{H}$  NMR (300 MHz,  $\text{CDCl}_3$ , 35  $^\circ\text{C}$ )  $\delta$  0.91 (d,  $J$  = 6.9 Hz, 3H,  $\text{CH}(\text{CH}_3)_2$ ), 1.01 (d,  $J$  = 6.9 Hz, 3H,  $\text{CH}(\text{CH}_3)_2$ ), 1.8-1.9 (m, 1H,  $\text{CH}(\text{CH}_3)_2$ ), 4.08 (m, 2H,  $\text{CH}_2\text{O}$ ), 4.35 (m, 1H,  $\text{CHCH}_2$ ), 7.39 (m, 3H, Ar), 7.73 (dd,  $J$  = 8.4, 1.8, 2H, Ar);  $^{13}\text{C}$  NMR (75 MHz,  $\text{CDCl}_3$ , 35  $^\circ\text{C}$ )  $\delta$  18.06, 18.83, 32.77, 69.93, 72.52, 127.97, 127.98, 130.80, 162.94; MS

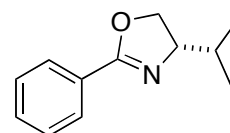

(EI)  $m/z$  (relative intensity) 190 ( $[M^+ + H]$ , 17), 189 (100), 174 (12), 162 (28); HRMS (EI)  $m/z$  calcd. for  $C_{12}H_{15}NO$  189.1154, found 189.1147;  $[\alpha]_{25}^{25} -61.1$  ( $c$  0.39,  $CH_2Cl_2$ ).

**(S)-4-Isopropyl-2-[4-(methoxyethoxymethoxy)phenyl]oxazoline (4ba)**

Purified by flush column chromatography (silica gel, Hexane/EtOAc = 8 to 4/1); colorless oil; IR (neat NaCl,  $\nu$ ) 1667, 1604, 1495, 1454, 1078, 753, 699  $cm^{-1}$ ;  $^1H$  NMR (300 MHz,  $CDCl_3$ , 35  $^\circ C$ )  $\delta$  0.92 (d,  $J$  = 6.9 Hz, 3H,  $CH(CH_3)_2$ ), 1.02 (d,  $J$  =

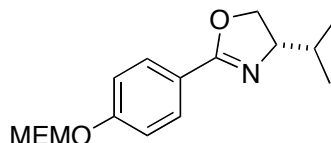

6.9 Hz, 3H,  $CH(CH_3)_2$ ), 1.8-1.9 (m, 1H,  $CH(CH_3)_2$ ), 3.35 (s, 1H,  $CH_3O(CH_2)_2OCH_2O$ ), 3.5 (m, 2H,  $CH_3O(CH_2)_2OCH_2O$ ), 3.8 (m, 2H,  $CH_3O(CH_2)_2OCH_2O$ ), 4.0-4.1 (m, 2H,  $NCHCH_2$ ), 4.3-4.4 (m, 1H,  $NCHCH_2$ ), 5.28 (s, 2H,  $CH_3O(CH_2)_2OCH_2O$ ), 7.05 (d,  $J$  = 9.0 Hz, 2H, *Ar*), 7.88 (d,  $J$  = 9.0 Hz, 2H, *Ar*);  $^{13}C$  NMR (75 MHz,  $CDCl_3$ , 35  $^\circ C$ )  $\delta$  18.41, 19.26, 33.17, 59.21, 68.09, 70.24, 71.83, 72.86, 93.47, 115.96, 121.82, 130.02, 159.70, 163.05; MS (EI)  $m/z$  (relative intensity) 293 ( $[M^+]$ , 24), 276 (40), 251 (52), 250 (100), 220 (17), 218 (17); HRMS (EI)  $m/z$  calcd. for  $C_{16}H_{23}NO_4$  293.1627, found 293.1554;  $[\alpha]_{25}^{25} -44.7$  ( $c$  1.1,  $CH_2Cl_2$ ).

**(S)-4-Isopropyl-2-[4-(tert-butyldimethylsiloxy)phenyl]oxazoline (4ca)**

Purified by flush column chromatography (silica gel, Hexane/EtOAc = 20 to 4/1); colorless oil; IR (neat NaCl,  $\nu$ ) 2957, 2859, 1651, 1606, 1512, 1471, 1354, 1268, 1164, 1074, 913, 839, 806, 782, 673  $cm^{-1}$ ;  $^1H$  NMR (300 MHz,  $CDCl_3$ , 35

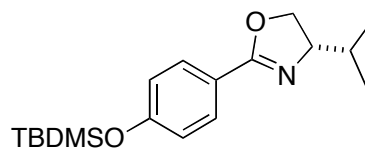

$^\circ C$ )  $\delta$  0.20 (s, 6H,  $tBuMe_2Si$ ), 1.03 (d,  $J$  = 6.6 Hz, 3H,  $CH(CH_3)_2$ ), 1.05 (s, 9H,  $tBuMe_2Si$ ), 1.30 (d,  $J$  = 6.6 Hz, 3H,  $CH(CH_3)_2$ ), 1.9-2.0 (m, 1H,  $CH(CH_3)_2$ ), 4.1-4.2 (m, 2H,  $NCHCH_2$ ), 4.4-4.5 (m, 1H,  $NCHCH_2$ ), 4.87 (s,  $TBDMSCH_2$ ), 7.45 (d,  $J$  = 8.1 Hz, 2H, *Ar*), 8.02 (d,  $J$  = 8.1 Hz, 2H, *Ar*);  $^{13}C$  NMR (75 MHz,  $CDCl_3$ , 35  $^\circ C$ )  $\delta$  -5.14, 18.17, 18.47, 19.01, 25.99, 32.92, 64.69, 70.02, 72.64, 125.64, 126.54, 128.09, 144.64, 163.10; MS (EI)  $m/z$  (relative intensity) 319 ( $[M^+]$ , 27), 304 (15), 278 (29), 277 (97), 276 (100), 262 (48), 248 (48), 221 (30), 217 (13), 212 (11); HRMS (EI)  $m/z$  calcd. for  $C_{18}H_{29}NO_2Si$  319.1968, found 319.1953;  $[\alpha]_{25}^{25} -39.1$  ( $c$  1.0,  $CH_2Cl_2$ ).

**(S)-4-Isopropyl-2-[4-(methoxyethoxymethoxymethyl)phenyl]oxazoline (4da)**

Purified by flush column chromatography (silica gel, Hexane/EtOAc = 6/1); colorless oil; IR (KBr disk,  $\nu$ ) 2963, 2890, 1721, 1668, 1651, 1456, 1363, 1049  $cm^{-1}$ ;  $^1H$  NMR

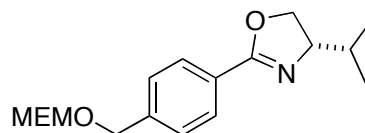

(300 MHz,  $CDCl_3$ , 35  $^\circ C$ )  $\delta$  0.91 (d,  $J$  = 6.9 Hz, 3H,  $CH(CH_3)_2$ ), 1.02 (d,  $J$  = 7.2 Hz, 3H,  $CH(CH_3)_2$ ), 1.8-1.9 (m, 1H,  $CH(CH_3)_2$ ), 3.36 (s, 3H,  $CH_3O(CH_2)_2OCH_2O$ ), 3.5-3.7 (m, 4H,  $CH_3O(CH_2)_2OCH_2O$ ), 4.0-4.1 (m, 2H,  $NCHCH_2O$ ), 4.3-4.4 (m, 1H,  $NCHCH_2O$ ), 4.63 (s, 2H,

CH<sub>3</sub>O(CH<sub>2</sub>)<sub>2</sub>OCH<sub>2</sub>O), 4.78, (s, 2H, MEMOCH<sub>2</sub>Ar), 7.37 (d, *J* = 8.1 Hz, 2H, *Ar*), 7.93 (d, *J* = 8.1 Hz, 2H, *Ar*); <sup>13</sup>C NMR (75 MHz, CDCl<sub>3</sub>, 35 °C) δ 17.93, 18.70, 32.65, 58.65, 66.77, 68.59, 69.80, 71.53, 72.37, 94.65, 126.92, 127.02, 127.96, 140.95, 162.69; MS (FAB) *m/z* (relative intensity) 309 ([M<sup>+</sup>+H], 28), 308 (100), 225 (15), 210 (15); HRMS (FAB) *m/z* calcd. for C<sub>17</sub>H<sub>27</sub>NO<sub>4</sub> 309.1940, found 309.1862; [α]<sub>589</sub><sup>25</sup> -23.4 (*c* 1.1, CH<sub>2</sub>Cl<sub>2</sub>).

**(S)-4-Isopropyl-2-[4-(*tert*-butyldimethylsiloxymethyl)phenyl]oxazoline (4ea)**

Purified by flush column chromatography (silica gel, Hexane/EtOAc = 20 to 10/1); colorless oil; IR (neat NaCl, ν) 2956, 2857, 1651, 1470, 1360, 1256, 1116, 1074, 838,

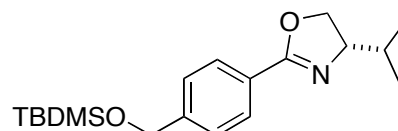

TBDMSO 777, 726, 671 cm<sup>-1</sup>; <sup>1</sup>H NMR (300 MHz, CDCl<sub>3</sub>, 35 °C) δ 0.20 (s, 6H, <sup>t</sup>BuMe<sub>2</sub>Si), 1.03 (d, *J* = 6.6 Hz, 3H, CH(CH<sub>3</sub>)<sub>2</sub>), 1.05 (s, 9H, <sup>t</sup>BuMe<sub>2</sub>Si), 1.30 (d, *J* = 6.6 Hz, 3H, CH(CH<sub>3</sub>)<sub>2</sub>), 1.9-2.0 (m, 1H, CH(CH<sub>3</sub>)<sub>2</sub>), 4.1-4.2 (m, 2H, NCHCH<sub>2</sub>), 4.4-4.5 (m, 1H, NCHCH<sub>2</sub>), 4.87 (s, TBDMSCH<sub>2</sub>), 7.45 (d, *J* = 8.1 Hz, 2H, *Ar*), 8.02 (d, *J* = 8.1 Hz, 2H, *Ar*); <sup>13</sup>C NMR (75 MHz, CDCl<sub>3</sub>, 35 °C) δ -5.14, 18.17, 18.47, 19.01, 25.99, 32.92, 64.69, 70.02, 72.64, 125.64, 126.54, 128.09, 144.64, 163.10; MS (EI) *m/z* (relative intensity) 333 ([M<sup>+</sup>], 26), 278 (100), 277 (100), 276 (100), 274 (17); HRMS (EI) *m/z* calcd. for C<sub>19</sub>H<sub>31</sub>NO<sub>2</sub>Si 333.2124, found 333.2105; [α]<sub>589</sub><sup>25</sup> -37.7 (*c* 1.1, CH<sub>2</sub>Cl<sub>2</sub>).

**(S)-2-(4-Bromophenyl)-4-isopropylloxazoline (4fa)**<sup>SI-4</sup>

Purified by flush column chromatography (silica gel, Hexane/EtOAc = 8/1); white solid; mp 69-70 °C; IR (film NaCl, ν) 2956, 1649, 1396, 1351, 1076, 1008, 964, 831, 665 cm<sup>-1</sup>; <sup>1</sup>H NMR (300 MHz, CDCl<sub>3</sub>,

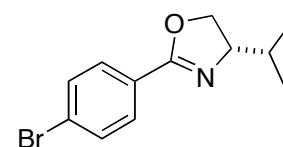

35 °C) δ 0.92 (d, *J* = 6.6 Hz, 3H, CH(CH<sub>3</sub>)<sub>2</sub>), 1.02 (d, *J* = 6.6 Hz, 3H, CH(CH<sub>3</sub>)<sub>2</sub>), 1.8-1.9 (m, 1H, CH(CH<sub>3</sub>)<sub>2</sub>), 4.1-4.2 (m, 2H, NCHCH<sub>2</sub>), 4.3-4.4 (m, 1H, NCHCH<sub>2</sub>), 7.52 (d, *J* = 8.4 Hz, 2H, *Ar*), 7.81 (d, *J* = 8.4 Hz, 2H, *Ar*); <sup>13</sup>C NMR (75 MHz, CDCl<sub>3</sub>, 35 °C) δ 18.23, 18.98, 32.91, 70.33, 72.80, 125.67, 126.89, 129.69, 131.40, 162.36; MS (EI) *m/z* (relative intensity) 269 ([M(<sup>81</sup>Br)<sup>+</sup>], 5), 267 ([M(<sup>79</sup>Br)<sup>+</sup>], 5), 226 (78), 224 (79); HRMS (EI) *m/z* calcd. for C<sub>12</sub>H<sub>14</sub><sup>79</sup>BrNO 267.0259 found 267.0234, calcd. for C<sub>12</sub>H<sub>14</sub><sup>81</sup>BrNO 269.0239 found 269.0236; [α]<sub>589</sub><sup>25</sup> -50.6 (*c* 1.0, CH<sub>2</sub>Cl<sub>2</sub>).

**(S)-4-Isopropyl-2-(4-nitrophenyl)oxazoline (4ga)**<sup>SI-3</sup>

Purified by flush column chromatography (silica gel, Hexane/EtOAc = 8/1); white-yellow solid; mp 54-55 °C; IR (film NaCl, ν cm<sup>-1</sup>) 2968, 1647, 1597, 1523, 1346, 1079, 966, 865, 850,

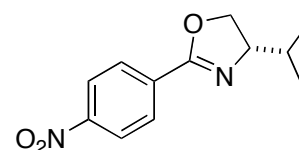

699; <sup>1</sup>H NMR (300 MHz, CDCl<sub>3</sub>, 35 °C) δ 0.95 (d, *J* = 6.9 Hz, 3H, CH(CH<sub>3</sub>)<sub>2</sub>), 1.05 (d, *J* = 6.9

Hz, 3H, CH(CH<sub>3</sub>)<sub>2</sub>), 1.8-1.9 (m, 1H, CH(CH<sub>3</sub>)<sub>2</sub>), 4.1-4.2 (m, 2H, NCHCH<sub>2</sub>), 4.4-4.5 (m, 1H, NCHCH<sub>2</sub>), 8.11 (d, *J* = 8.7 Hz, 2H, *Ar*), 8.20 (d, *J* = 8.7 Hz, 2H, *Ar*); <sup>13</sup>C NMR (75 MHz, CDCl<sub>3</sub>, 35 °C) δ 18.27, 18.86, 32.88, 70.73, 73.03, 123.25, 129.06, 133.65, 149.26, 161.29; MS (EI) *m/z* (relative intensity) 234 ([M<sup>+</sup>], 5), 191 (100), 163 (19), 117 (18); HRMS (EI) *m/z* calcd. for C<sub>12</sub>H<sub>14</sub>N<sub>2</sub>O<sub>3</sub> 234.1004 found 234.1032; [α]<sub>589</sub><sup>25</sup> -60.5 (*c* 1.0, CH<sub>2</sub>Cl<sub>2</sub>).

**(S)-2-Butyl-4-isopropylloxazoline (4ha).**

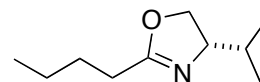

Purified by flush column chromatography (silica gel, Hexane/EtOAc = 8/1); colorless oil; IR (neat NaCl, ν) 2959, 1672, 1468, 1384, 1365, 1236, 1173, 984 cm<sup>-1</sup>; <sup>1</sup>H NMR (300 MHz, CDCl<sub>3</sub>, 35 °C) δ 0.87 (d, *J* = 6.9 Hz, 3H, CH(CH<sub>3</sub>)<sub>2</sub>), 0.92 (t, *J* = 7.2 Hz, 3H, CH<sub>3</sub>CH<sub>2</sub>), 0.95 (d, *J* = 6.9 Hz, 3H, CH(CH<sub>3</sub>)<sub>2</sub>), 1.37 (m, 2H, CH<sub>3</sub>CH<sub>2</sub>CH<sub>2</sub>), 1.59 (m, 2H, CH<sub>3</sub>CH<sub>2</sub>), 1.64 (sept like, 1H, CH(CH<sub>3</sub>)<sub>2</sub>), 2.27 (t, *J* = 7.2, 2H, CH<sub>2</sub>C), 3.91 (m, 2H, CH<sub>2</sub>O), 4.18 (m, 1H, CHCH<sub>2</sub>); <sup>13</sup>C NMR (75 MHz, CDCl<sub>3</sub>, 35 °C) δ 13.62, 17.95, 18.64, 22.29, 28.26, 32.48, 69.54, 71.93, 167.14; MS (EI) *m/z* (relative intensity) 169 ([M<sup>+</sup>], 13), 168 (66), 126 (100); HRMS (EI) *m/z* calcd. for C<sub>10</sub>H<sub>19</sub>NO 169.1467, found 169.1440; [α]<sub>589</sub><sup>25</sup> -64.9 (*c* 1.0, CH<sub>2</sub>Cl<sub>2</sub>).

**(S)-2-Heptadecanyl-4-isopropylloxazoline (4ia)**

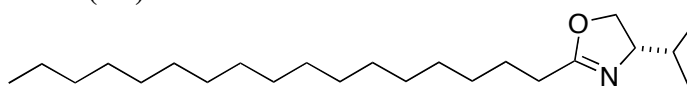

Purified by flush column chromatography (silica gel, Hexane/EtOAc = 8/1); white solid; mp 33-34 °C; IR (neat NaCl, ν) 2919, 2848, 1672, 1469, 1378, 1216, 978, 923, 903, 719 cm<sup>-1</sup>; <sup>1</sup>H NMR (300 MHz, CDCl<sub>3</sub>, 35 °C) δ 0.8-0.9 (m, 2H, CH<sub>2</sub>), 0.87 (d, *J* = 6.6 Hz, 3H, CH(CH<sub>3</sub>)<sub>2</sub>), 0.95 (d, *J* = 6.6 Hz, 3H, CH(CH<sub>3</sub>)<sub>2</sub>), 1.26 (br, 29H, CH<sub>3</sub>, CH<sub>2</sub>), 1.5-1.7 (m, 2H, CH<sub>2</sub>), 1.7-1.8 (m, 1H, CH(CH<sub>3</sub>)<sub>2</sub>), 2.26 (t, *J* = 7.8 Hz, 2H, CH<sub>2</sub>-oxazoline), 3.8-4.0 (m, 2H, NCHCH<sub>2</sub>), 4.1-4.2 (m, 1H, NCHCH<sub>2</sub>); <sup>13</sup>C NMR (75 MHz, CDCl<sub>3</sub>, 35 °C) δ 14.15, 18.10, 18.81, 22.75, 26.31, 28.20, 29.31, 29.41, 29.54, 29.65, 29.71, 29.75, 31.98, 32.62, 69.69, 72.58, 167.32; MS (EI) *m/z* (relative intensity) 351 ([M<sup>+</sup>], 16), 322 (11), 309 (61), 308 (100), 293 (11), 280 (14), 167 (11); HRMS (EI) *m/z* calcd. for C<sub>23</sub>H<sub>45</sub>NO 351.3518, found 351.3501; [α]<sub>589</sub><sup>25</sup> -33.3 (*c* 1.0, CH<sub>2</sub>Cl<sub>2</sub>).

**(S)-4-Isopropyl-2-phenethylloxazoline (4ja)<sup>SI-3</sup>**

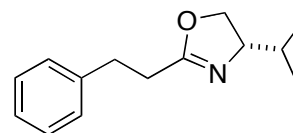

Purified by flush column chromatography (silica gel, Hexane/EtOAc = 4/1); colorless oil; IR (neat NaCl, ν) 2958, 1671, 1455, 1365, 1234, 1164, 985, 750, 698 cm<sup>-1</sup>; <sup>1</sup>H NMR (300 MHz, CDCl<sub>3</sub>, 35 °C) δ 0.84 (d, *J* = 6.6 Hz, 3H, CH(CH<sub>3</sub>)<sub>2</sub>), 0.93 (d, *J* = 6.6 Hz, 3H, CH(CH<sub>3</sub>)<sub>2</sub>), 1.69 (sept like, 1H, CH(CH<sub>3</sub>)<sub>2</sub>), 2.58 (t, *J* = 7.8 Hz, 2H, CH<sub>2</sub>CH<sub>2</sub>), 2.95 (t, *J* = 7.8 Hz, 2H, CH<sub>2</sub>CH<sub>2</sub>), 3.89 (m, 2H, CH<sub>2</sub>O), 4.18 (m, 1H, CHCH<sub>2</sub>), 7.1-7.3 (m, 5H, *Ph*); <sup>13</sup>C NMR (75 MHz, CDCl<sub>3</sub>, 35 °C) δ 18.05, 18.70, 29.80, 32.30, 32.52,



69.77, 72.06, 125.96, 128.11, 128.20, 140.51, 166.23; MS (EI)  $m/z$  (relative intensity) 217 ( $[M^+]$ , 84), 174 (92), 91 (82), 18 (100); HRMS (EI)  $m/z$  calcd. for  $C_{14}H_{19}NO$  217.1467, found 217.1460;  $[\alpha]_{589}^{25} -47.3$  ( $c$  1.0,  $CH_2Cl_2$ ).

**(S)-2-Phenethyl-4-tert-butyloxazoline (4jb)**<sup>SI-3</sup>

Purified by flush column chromatography (silica gel, Hexane/EtOAc = 6/1); colorless oil; IR (neat NaCl,  $\nu$ ) 2954, 1673, 1362, 1230, 1209, 1171, 983, 698  $cm^{-1}$ ;  $^1H$  NMR (300 MHz,  $CDCl_3$ , 35 °C)  $\delta$  0.84 (s, 9H,  $C(CH_3)_3$ ), 2.5-2.6 (m, 2H,  $CH_2CH_2$ ), 2.94 (t,  $J = 8.1$ , 2H,  $CH_2CH_2$ ), 3.7-3.8 (m, 1H,  $NCHCH_2$ ), 4.00 (dd,  $J = 8.4$ , 8.4 Hz, 1H,  $NCHCH_2$ ), 4.11 (dd,  $J = 8.4$ , 10.2 Hz, 1H,  $NCHCH_2$ ), 7.1-7.3 (m, 5H, *Ph*);  $^{13}C$  NMR (75 MHz,  $CDCl_3$ , 35 °C)  $\delta$  25.72, 29.73, 32.30, 33.41, 68.30, 75.70, 125.91, 128.11, 128.15, 140.49, 166.09; MS (EI)  $m/z$  (relative intensity) 231 ( $[M^+]$ , 64), 174 (100), 91 (55); HRMS (EI)  $m/z$  calcd. for  $C_{15}H_{21}NO$  231.1623 found 231.1612;  $[\alpha]_{589}^{25} -47.1$  ( $c$  1.1,  $CH_2Cl_2$ ).

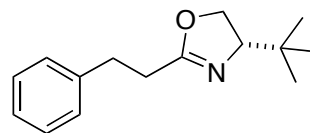

**4,4-Dimethyl-2-phenethyloxazoline (4jc)**<sup>SI-5</sup>

Purified by flush column chromatography (silica gel, Hexane/EtOAc = 4/1); colorless oil; IR (neat NaCl,  $\nu$ ) 1668, 1604, 1496, 1455, 1363, 1146, 1078, 990, 750, 699  $cm^{-1}$ ;  $^1H$  NMR (300 MHz,  $CDCl_3$ , 35 °C)  $\delta$  1.23 (s, 6H,  $NC(CH_3)_2$ ), 2.55 (t,  $J = 7.5$  Hz, 2H,  $PhCH_2CH_2$ ), 3.03 (t,  $J = 7.5$  Hz, 2H,  $PhCH_2CH_2$ ), 3.88 (s, 2H,  $NCCH_2$ ), 7.2-7.3 (m, 5H, *Ph*);  $^{13}C$  NMR (75 MHz,  $CDCl_3$ , 35 °C)  $\delta$  28.43, 29.93, 32.29, 66.93, 78.95, 126.04, 128.20, 128.26, 140.50, 164.92; MS (EI)  $m/z$  (relative intensity) 203 ( $[M^+]$ , 100), 202 (65), 188 (22), 162 (16); HRMS (EI)  $m/z$  calcd. for  $C_{13}H_{17}NO$  203.1310, found 203.1283.

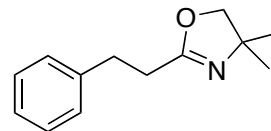

**(3a*S*,8a*R*)-2-Phenethyl-3a,8a-dihydro-8*H*-indeno[1,2-*d*]oxazole (4jd)**

Purified by flush column chromatography (silica gel, Hexane/EtOAc = 4/1); white solid; mp 78-81 °C; IR (neat NaCl,  $\nu$ ) 1667, 1604, 1495, 1454, 1078, 753, 699  $cm^{-1}$ ;  $^1H$  NMR (300 MHz,  $CDCl_3$ , 35 °C)  $\delta$  2.53 (t,  $J = 7.5$  Hz, 2H,  $PhCH_2CH_2$ ), 2.90 (t,  $J = 7.5$  Hz, 2H,  $PhCH_2CH_2$ ), 3.17 (dd,  $J = 1.5$ , 17.7 Hz, 1H,  $NCHCHO$ ), 3.38 (dd,  $J = 7.2$ , 17.7 Hz, 1H,  $NCHCHO$ ), 5.26 (ddd,  $J = 3.0$ , 7.2, 7.5 Hz, 1H,  $OCHCH_2Ar$ ), 5.49 (d,  $J = 7.5$  Hz, 1H,  $OCHCH_2Ar$ ), 7.1-7.5 (m, 9H, *Ar*);  $^{13}C$  NMR (75 MHz,  $CDCl_3$ , 35 °C)  $\delta$  30.01, 32.30, 39.83, 76.53, 82.85, 125.12, 125.37, 126.02, 127.32, 128.14, 128.27, 139.55, 140.40, 142.04, 167.12; MS (EI)  $m/z$  (relative intensity) 263 ( $[M^+]$ , 100), 262 (43), 236 (20), 228 (10), 227 (74), 224 (10), 212 (20), 203 (42), 202 (25), 186 (38), 182 (18), 170 (13), 162 (55); HRMS (EI)  $m/z$  calcd. for  $C_{18}H_{17}NO$  263.1310, found 263.1297;  $[\alpha]_{589}^{25} -157.8$  ( $c$  1.0,  $CH_2Cl_2$ ).

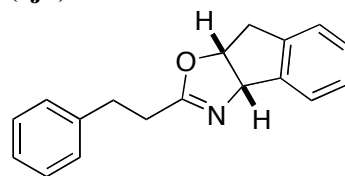

**(S)-2-Phenethyl-4-phenylmethyloxazoline (4je)**<sup>SI-6</sup>

Purified by flush column chromatography (silica gel, Hexane/EtOAc = 4/1); colorless oil; IR (neat NaCl,  $\nu$ ) 1667, 1496, 1454, 983, 751, 699  $\text{cm}^{-1}$ ;  $^1\text{H}$  NMR (300 MHz,  $\text{CDCl}_3$ , 35  $^\circ\text{C}$ )  $\delta$  2.5-2.6 (m, 3H,  $\text{PhCH}_2$ ,  $\text{PhCH}_2\text{CH}_2$ ), 2.93 (t,  $J = 8.0$

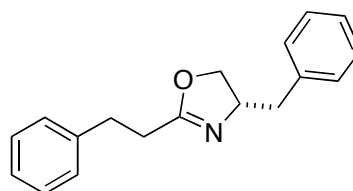

Hz, 2H,  $\text{PhCH}_2\text{CH}_2$ ), 3.00 (dd,  $J = 5.1, 13.8$  Hz, 1H,  $\text{PhCH}_2$ ), 3.89 (dd,  $J = 7.5, 8.4$  Hz, 1H,  $\text{NCHCH}_2$ ), 4.09 (dd,  $J = 8.4, 8.4$  Hz, 1H,  $\text{NCHCH}_2$ ), 4.2-4.4 (m, 1H,  $\text{NCHCH}_2$ ), 7.1-7.3 (m, 10H, *Ph*);  $^{13}\text{C}$  NMR (75 MHz,  $\text{CDCl}_3$ , 35  $^\circ\text{C}$ )  $\delta$  29.63, 32.03, 41.67, 67.08, 71.37, 125.92, 126.15, 128.02, 128.15, 128.16, 128.94, 137.67, 140.36, 166.75; MS (EI)  $m/z$  (relative intensity) 266 ( $[\text{M}^+\text{+H}]$ , 19), 265 (100), 244 (13), 236 (23), 224 (10), 217 (26), 212 (20); HRMS (EI)  $m/z$  calcd. for  $\text{C}_{12}\text{H}_{21}\text{NO}$  265.1467, found 265.1483;  $[\alpha]_{589}^{25} -40.9$  ( $c$  1.1,  $\text{CH}_2\text{Cl}_2$ ).

**(R)-4-Phenyl-2-(3-phenylethyl)oxazoline (4jf)**<sup>SI-3,6</sup>

Purified by flush column chromatography (silica gel, Hexane/EtOAc = 4/1); colorless oil; IR (neat NaCl,  $\nu$ ) 1667,

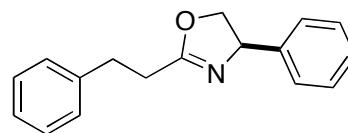

1604, 1495, 1454, 1078, 753, 699  $\text{cm}^{-1}$ ;  $^1\text{H}$  NMR (300 MHz,  $\text{CDCl}_3$ , 35  $^\circ\text{C}$ )  $\delta$  2.71 (t,  $J = 7.5$  Hz, 2H,  $\text{PhCH}_2\text{CH}_2$ ), 3.03 (t,  $J = 7.5$  Hz, 2H,  $\text{PhCH}_2\text{CH}_2$ ), 4.02 (dd,  $J = 8.4, 8.4$  Hz, 1H,  $\text{NCHCH}_2$ ), 4.56 (dd,  $J = 8.4, 10.2$  Hz, 1H,  $\text{NCHCH}_2$ ), 5.13 (m, 1H,  $\text{NCHCH}_2$ ), 7.1-7.3 (m, 10H, *Ph*);  $^{13}\text{C}$  NMR (75 MHz,  $\text{CDCl}_3$ , 35  $^\circ\text{C}$ )  $\delta$  29.72, 32.15, 69.58, 74.54, 126.10, 126.40, 127.27, 128.24, 128.34, 128.47, 140.36, 142.22, 167.71; MS (EI)  $m/z$  (relative intensity) 251 ( $[\text{M}^+]$ , 88), 250 (41), 220 (10), 204 (12), 203 (100), 202 (56), 188 (25), 174 (11), 212 (20); HRMS (EI)  $m/z$  calcd. for  $\text{C}_{17}\text{H}_{17}\text{NO}$  251.1310, found 251.1305;  $[\alpha]_{589}^{25} +47.8$  ( $c$  1.0,  $\text{CH}_2\text{Cl}_2$ ).

**(S)-5,5-Dimethyl-2-(3-phenylethyl)-4-phenylmethyloxazoline (4jg)**

Purified by flush column chromatography (silica gel, Hexane/EtOAc = 8/1); colorless oil; IR (neat NaCl,  $\nu$ ) 3027, 2974, 1663, 1496, 1454, 1386, 1370, 1146, 742, 698  $\text{cm}^{-1}$ ;  $^1\text{H}$  NMR (300 MHz,  $\text{CDCl}_3$ , 35  $^\circ\text{C}$ )  $\delta$  1.22 (s, 3H,  $\text{CH}_3$ ), 1.25 (s,

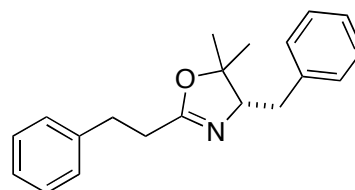

3H,  $\text{CH}_3$ ), 2.54 (t,  $J = 8.1$  Hz, 2H,  $\text{PhCH}_2\text{CH}_2$ ), 2.66 (dd, 1H,  $J = 7.2, 14.1$  Hz,  $\text{CHCH}_2\text{Ph}$ ), 2.86 (dd,  $J = 7.8, 14.1$  Hz, 1H,  $\text{CHCH}_2\text{Ph}$ ), 2.93 (t,  $J = 8.1$  Hz, 1H,  $\text{PhCH}_2\text{CH}_2$ ), 3.92 (dd,  $J = 7.2, 7.8$  Hz, 1H,  $\text{CHCH}_2\text{Ph}$ ), 7.2-7.3 (m, 10H, *Ph*);  $^{13}\text{C}$  NMR (75 MHz,  $\text{CDCl}_3$ , 35  $^\circ\text{C}$ )  $\delta$  21.89, 28.50, 30.20, 32.14, 37.64, 74.72, 85.68, 125.97, 128.16, 128.18, 128.22, 128.81, 139.07, 140.52, 165.16; MS (EI)  $m/z$  (relative intensity) 293 ( $[\text{M}^+]$ , 35), 202 (100); HRMS (EI)  $m/z$  calcd. for  $\text{C}_{20}\text{H}_{23}\text{NO}$  293.1780, found 293.1791;  $[\alpha]_{589}^{25} -99.1$  ( $c$  1.1,  $\text{CH}_2\text{Cl}_2$ ).

**(S)-2-(3-Hydroxypropyl)-4-isopropylloxazoline (6aa)**

Purified by flush column chromatography (silica gel, Hexane/EtOAc/Et<sub>3</sub>N = 20/10/1); colorless oil; IR (neat NaCl,  $\nu$ )

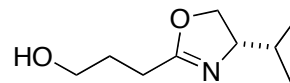

3298, 2960, 1664, 1468, 1368, 984  $\text{cm}^{-1}$ ; <sup>1</sup>H NMR (300 MHz, CDCl<sub>3</sub>, 35 °C)  $\delta$  0.88 (d,  $J$  = 6.9 Hz, 3H, CH(CH<sub>3</sub>)<sub>2</sub>), 0.95 (d,  $J$  = 6.9 Hz, 3H, CH(CH<sub>3</sub>)<sub>2</sub>), 1.6-1.8 (m, 1H, CH(CH<sub>3</sub>)<sub>2</sub>), 1.89 (tt,  $J$  = 6.0, 6.6 Hz, 2H, HOCH<sub>2</sub>CH<sub>2</sub>CH<sub>2</sub>), 2.42 (t,  $J$  = 6.6 Hz, 2H, HOCH<sub>2</sub>CH<sub>2</sub>CH<sub>2</sub>), 3.69 (t,  $J$  = 6.0 Hz, 2H, HOCH<sub>2</sub>CH<sub>2</sub>CH<sub>2</sub>), 3.8-4.0 (m, 2H, NCHCH<sub>2</sub>), 4.2-4.3 (m, 1H, NCHCH<sub>2</sub>), 4.4 (br, 1H, OH); <sup>13</sup>C NMR (75 MHz, CDCl<sub>3</sub>, 35 °C)  $\delta$  18.23, 18.67, 26.02, 28.51, 32.62, 62.25, 70.38, 71.71, 168.29; MS (EI)  $m/z$  (relative intensity) 128 ([M<sup>+</sup>-i-Pr], 95), 110 (100); [ $\alpha$ ]<sub>589</sub><sup>25</sup> -49.5 (c 1.0, CH<sub>2</sub>Cl<sub>2</sub>).

**(S)-2-[(rac)-3-Hydroxypentyl]-4-isopropylloxazoline (6ba)**

Purified by flush column chromatography (silica gel, Hexane/EtOAc/Et<sub>3</sub>N = 20/20/1); colorless oil; IR (neat NaCl,  $\nu$ )

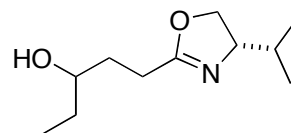

3316, 2961, 1668, 1465, 1364, 987  $\text{cm}^{-1}$ ; <sup>1</sup>H NMR (300 MHz, CDCl<sub>3</sub>, 35 °C)  $\delta$  0.87 (d,  $J$  = 6.9 Hz, 3H, CH(CH<sub>3</sub>)<sub>2</sub>), 0.95 (t,  $J$  = 6.9 Hz, 3H, CH<sub>2</sub>CH<sub>3</sub>), 1.4-1.6 (m, 2H, CH<sub>2</sub>CH<sub>3</sub>), 4.7-4.9 (m, 3H, HOCH(Et)CH<sub>2</sub>CH<sub>2</sub>, CH(CH<sub>3</sub>)<sub>2</sub>), 2.3-2.5 (m, 2H, HOCH(Et)CH<sub>2</sub>CH<sub>2</sub>), 3.5-3.6 (m, 1H, HOCH(Et)CH<sub>2</sub>CH<sub>2</sub>), 3.8-4.0 (m, 2H, NCHCH<sub>2</sub>), 4.2-4.3 (m, 1H, NCHCH<sub>2</sub>), 4.4 (br, 1H, OH); <sup>13</sup>C NMR (75 MHz, CDCl<sub>3</sub>, 35 °C)  $\delta$  10.03, 10.10, 18.29, 18.31, 18.73, 18.79, 25.34, 25.39, 30.44, 32.35, 32.50, 32.67, 70.32, 70.38, 71.77, 71.85, 72.78, 72.86, 168.36, 168.47; MS (EI)  $m/z$  (relative intensity) 198 ([M<sup>+</sup>-H], 33), 182 (14), 179 (20), 167 (29), 165 (58), 153 (94); HRMS (EI)  $m/z$  calcd. for C<sub>11</sub>H<sub>20</sub>NO<sub>2</sub>([M<sup>+</sup>-H]) 198.1494 found 198.1515.

**(S)-2-(4-Hydroxybutyl)-4-isopropylloxazoline (6ca)**

Purified by flush column chromatography (silica gel, Hexane/EtOAc/Et<sub>3</sub>N = 10/20/1); colorless oil; IR (neat NaCl,  $\nu$ )

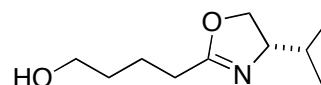

3299, 2959, 2873, 1662, 1542, 1464, 1368, 1066, 984  $\text{cm}^{-1}$ ; <sup>1</sup>H NMR (300 MHz, CDCl<sub>3</sub>, 35 °C)  $\delta$  0.87 (d,  $J$  = 6.9 Hz, 3H, CH(CH<sub>3</sub>)<sub>2</sub>), 0.95 (d,  $J$  = 6.9 Hz, 3H, CH(CH<sub>3</sub>)<sub>2</sub>), 1.5-1.8 (m, 5H, CH<sub>2</sub>CH<sub>2</sub>CH<sub>2</sub>OH and CH(CH<sub>3</sub>)<sub>2</sub>), 2.31 (t,  $J$  = 7.2 Hz, 2H, CH<sub>2</sub>(CH<sub>2</sub>)<sub>3</sub>OH), 3.60 (t,  $J$  = 6.0 Hz, 2H, CH<sub>2</sub>OH), 3.8-3.9 (m, 2H, NCHCH<sub>2</sub>), 4.0 (br, 1H, OH), 4.1-4.3 (m, 1H, NCHCH<sub>2</sub>); <sup>13</sup>C NMR (75 MHz, CDCl<sub>3</sub>, 35 °C)  $\delta$  17.85, 18.51, 21.96, 27.38, 32.01, 32.30, 61.07, 69.65, 71.51, 167.68; MS (EI)  $m/z$  (relative intensity) 185 ([M<sup>+</sup>], 100), 170 (11), 168 (19), 156 (63); HRMS (EI)  $m/z$  calcd. for C<sub>10</sub>H<sub>19</sub>NO<sub>2</sub> 185.1416, found 185.1411; [ $\alpha$ ]<sub>589</sub><sup>25</sup> -43.3 (c 1.2, CH<sub>2</sub>Cl<sub>2</sub>).

**(S)-2-(5-Hydroxypentyl)-4-isopropylloxazoline (6da)**

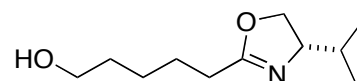

Purified by flush column chromatography (silica gel, Hexane/EtOAc/Et<sub>3</sub>N = 10/20/1); colorless oil; IR (neat NaCl,  $\nu$ ) 3309, 2934, 2871, 1664, 1465, 1368, 984 cm<sup>-1</sup>; <sup>1</sup>H NMR (300 MHz, CDCl<sub>3</sub>, 35 °C)  $\delta$  0.87 (d,  $J$  = 6.9 Hz, 3H, CH(CH<sub>3</sub>)<sub>2</sub>), 0.94 (d,  $J$  = 6.9 Hz, 3H, CH(CH<sub>3</sub>)<sub>2</sub>), 1.3-1.8 (m, 7H, (CH<sub>2</sub>)<sub>3</sub>CH<sub>2</sub>OH and CH(CH<sub>3</sub>)<sub>2</sub>), 2.28 (t,  $J$  = 7.5 Hz, 2H, CH<sub>2</sub>(CH<sub>2</sub>)<sub>3</sub>OH), 3.5 (br, 1H, OH), 3.60 (t,  $J$  = 6.3 Hz, 2H, CH<sub>2</sub>OH), 3.8-3.9 (m, 2H, NCHCH<sub>2</sub>), 4.1-4.3 (m, 1H, NCHCH<sub>2</sub>); <sup>13</sup>C NMR (75 MHz, CDCl<sub>3</sub>, 35 °C)  $\delta$  17.79, 18.54, 25.26, 25.53, 27.80, 32.08, 32.29, 61.77, 69.54, 71.54, 167.48; MS (EI)  $m/z$  (relative intensity) 199 ([M<sup>+</sup>], 28), 184 (10), 182 (36), 170 (20), 169 (27), 158 (36), 157 (100); HRMS (EI)  $m/z$  calcd. for C<sub>11</sub>H<sub>21</sub>NO<sub>2</sub> 199.1572, found 199.1543; [ $\alpha$ ]<sub>589</sub><sup>25</sup> -46.0 ( $c$  1.2, CH<sub>2</sub>Cl<sub>2</sub>).

**(S)-4-tert-Butyl-2-(4-cyanophenethyl)oxazoline (9a)**

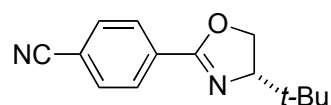

Purified by column chromatography (silica gel, Hexane/EtOAc = 8/1); white solid; mp 105-107 °C; IR (film NaCl,  $\nu$ ) 2965, 2229, 1651, 1361, 1260, 1082, 955 cm<sup>-1</sup>; <sup>1</sup>H NMR (300 MHz, CDCl<sub>3</sub>, 35 °C)  $\delta$  0.95 (s, 9H, C(CH<sub>3</sub>)<sub>3</sub>), 4.08 (dd,  $J$  = 8.1, 10.2 Hz, 1H, CHCH<sub>2</sub>), 4.26 (dd,  $J$  = 8.1, 10.2 Hz, 1H, CHCH<sub>2</sub>), 4.38 (dd,  $J$  = 8.1, 8.1 Hz, 10.2 Hz, 1H, CHCH<sub>2</sub>), 7.68 (dd,  $J$  = 1.8, 6.6 Hz, 2H, Ar), 8.05 (dd,  $J$  = 1.8, 6.6 Hz, 2H, Ar); <sup>13</sup>C NMR (75 MHz, CDCl<sub>3</sub>, 35 °C)  $\delta$  25.92, 34.09, 69.16, 76.50, 114.50, 118.18, 128.69, 131.88, 132.05, 161.48; MS (EI)  $m/z$  (relative intensity) 228 ([M<sup>+</sup>], 3), 213 (4), 183 (4), 172 (100); HRMS (EI)  $m/z$  calcd. for C<sub>14</sub>H<sub>16</sub>N<sub>2</sub>O 228.1263 found 228.1251; [ $\alpha$ ]<sub>589</sub><sup>25</sup> -66.3 ( $c$  1.0, CH<sub>2</sub>Cl<sub>2</sub>).

**1,4-Bis[(S)-4-tert-butylloxazolin-2-yl]benzene (10)**

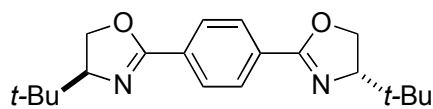

Purified by column chromatography (silica gel, Hexane/EtOAc = 8/1); white solid; mp 190-195 °C; IR (film NaCl,  $\nu$ ) 2959, 1650, 1356, 1263, 1075, 1054, 968, 904 cm<sup>-1</sup>; <sup>1</sup>H NMR (300 MHz, CDCl<sub>3</sub>, 35 °C)  $\delta$  0.96 (s, 18H, C(CH<sub>3</sub>)<sub>3</sub>), 4.05 (dd,  $J$  = 8.1, 10.2 Hz, 2H, CHCH<sub>2</sub>), 4.24 (dd,  $J$  = 8.1, 8.1 Hz, 2H, CHCH<sub>2</sub>), 4.35 (dd,  $J$  = 8.1, 10.2 Hz, 2H, CHCH<sub>2</sub>), 7.98 (s, 4H, Ar); <sup>13</sup>C NMR (75 MHz, CDCl<sub>3</sub>, 35 °C)  $\delta$  25.99, 34.12, 68.83, 76.41, 128.02, 130.31, 162.52; MS (EI)  $m/z$  (relative intensity) 328 ([M<sup>+</sup>], 1), 313 (4), 271 (100); HRMS (EI)  $m/z$  calcd. for C<sub>20</sub>H<sub>28</sub>N<sub>2</sub>O<sub>2</sub> 328.2151 found 328.2144; [ $\alpha$ ]<sub>589</sub><sup>25</sup> -98.3 ( $c$  0.27, CH<sub>2</sub>Cl<sub>2</sub>).

**(S)-4-tert-Butyl-2-(3-cyanophenethyl)oxazoline (9b)**

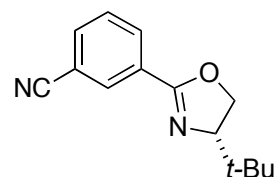

Purified by flush column chromatography (silica gel, Hexane/EtOAc = 8/1); white solid; mp 65-67 °C; IR (film NaCl,  $\nu$ ) 2234, 1653, 1361, 1180, 1079, 962, 815, 698 cm<sup>-1</sup>; <sup>1</sup>H NMR (300 MHz, CDCl<sub>3</sub>, 35 °C)  $\delta$  0.96 (s, 9H, C(CH<sub>3</sub>)<sub>3</sub>), 4.07 (dd,  $J$  = 8.1, 10.2 Hz, 1H, NCHCH<sub>2</sub>), 4.26 (dd,  $J$  = 8.1, 8.7 Hz, 1H, NCHCH<sub>2</sub>), 4.38 (dd,  $J$  = 8.7, 10.2 Hz, 1H, NCHCH<sub>2</sub>), 7.51 (dd,  $J$  = 6.3, 7.5 Hz, 1H, Ar-5), 7.73

(dd,  $J = 1.5, 7.5$  Hz, 1H, *Ar-4* or *6*), 8.18 (dd,  $J = 1.5, 6.3$  Hz, 1H, *Ar-4* or *6*), 8.25 (dd,  $J = 1.5, 1.5$  Hz, *Ar-2*);  $^{13}\text{C}$  NMR (75 MHz,  $\text{CDCl}_3$ , 35 °C)  $\delta$  25.89, 34.02, 69.16, 76.39, 112.65, 117.97, 129.01, 129.31, 131.75, 132.13, 134.01, 161.07; MS (EI)  $m/z$  (relative intensity) 228 ( $[\text{M}^+\text{H}]$ , 5), 172 (100), 143 (20), 130 (35); HRMS (EI)  $m/z$  calcd. for  $\text{C}_{14}\text{H}_{16}\text{N}_2\text{O}$  228.1263, found 228.1241;  $[\alpha]_{589}^{25} -59.5$  ( $c$  1.0,  $\text{CH}_2\text{Cl}_2$ ).

**(*S*)-4-*tert*-Butyl-2-(4-methoxycarbonylphenethyl)oxazoline (13)**

Purified by flush column chromatography (silica gel, Hexane/EtOAc = 8/1); white solid; mp 117–118 °C; IR (film NaCl,  $\nu$ ) 1720, 1651, 1434, 1407, 1279, 1105, 1079, 1058,

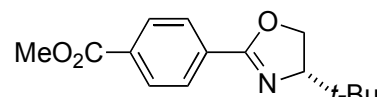

1014, 972, 866, 708  $\text{cm}^{-1}$ ;  $^1\text{H}$  NMR (300 MHz,  $\text{CDCl}_3$ , 35 °C)  $\delta$  0.96 (s, 9H,  $\text{C}(\text{CH}_3)_3$ ), 3.93 (s, 3H,  $\text{COOCH}_3$ ), 4.07 (dd,  $J = 9.0, 10.2$  Hz, 1H,  $\text{NCHCH}_2$ ), 4.25 (dd,  $J = 9.0, 9.0$  Hz, 1H,  $\text{NCHCH}_2$ ), 4.37 (dd,  $J = 9.0, 10.2$  Hz, 1H,  $\text{NCHCH}_2$ ), 8.01 (d,  $J = 8.4$  Hz, 2H, *Ar*), 8.06 (d,  $J = 8.4$  Hz, 1H, *Ar*);  $^{13}\text{C}$  NMR (75 MHz,  $\text{CDCl}_3$ , 35 °C)  $\delta$  25.98, 34.12, 52.26, 68.96, 76.47, 128.13, 129.35, 132.00, 132.24, 162.30, 166.35; MS (EI)  $m/z$  (relative intensity) 266 ( $[\text{M}^+\text{H}]$ , 19), 265 (100), 244 (13), 236 (23), 224 (10), 217 (26), 212 (20); HRMS (EI)  $m/z$  calcd. for  $\text{C}_{15}\text{H}_{19}\text{NO}_3$  261.1365, found 261.1350;  $[\alpha]_{589}^{25} -48.9$  ( $c$  1.0,  $\text{CH}_2\text{Cl}_2$ ).

**1-[(3*aS*,8*aR*)-8,8*a*-dihydro-3*aH*-indeno[1,2-*d*]oxazol-2-yl]-4-[(*S*)-4-*tert*-butyloxazolin-2-yl]benzene (14)**

Purified by column chromatography (silica gel, Hexane/EtOAc = 8/1); white solid; mp 178-179 °C

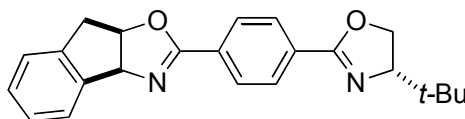

(dec.); IR (film NaCl,  $\nu$ ) 2956, 1644, 1412, 1355, 1086, 1071, 860, 751, 688  $\text{cm}^{-1}$ ;  $^1\text{H}$  NMR (300 MHz,  $\text{CDCl}_3$ , 35 °C)  $\delta$  0.95 (s, 9H,  $\text{C}(\text{CH}_3)_3$ ), 3.36 (dd,  $J = 1.8, 18.0$  Hz, 1H,  $\text{CH}_2\text{Ar}$ ), 3.51 (dd,  $J = 6.6, 18.0$  Hz, 1H,  $\text{CH}_2\text{Ar}$ ), 4.04 (dd,  $J = 8.1, 10.2$  Hz, 1H,  $\text{CHCH}_2$ ), 4.22 (dd,  $J = 8.1, 10.2$  Hz, 1H,  $\text{CHCH}_2$ ), 4.34 (dd,  $J = 8.1, 10.2$  Hz, 1H,  $\text{CHCH}_2$ ), 5.49 (ddd,  $J = 1.8, 6.6, 7.8$  Hz, 1H,  $\text{NCHCHO}$ ), 5.75 (d,  $J = 7.8$  Hz, 1H,  $\text{NCHCHO}$ ), 7.25–7.27 (m, 3H, *Ar*), 7.55–7.58 (m, 1H, *Ar*), 7.95 (s, 4H, *Ar*);  $^{13}\text{C}$  NMR (75 MHz,  $\text{CDCl}_3$ , 35 °C)  $\delta$  25.99, 34.11, 39.90, 68.84, 76.42, 77.18, 125.21, 125.56, 127.42, 128.01, 128.15, 128.44, 130.21, 130.42, 139.60, 141.74, 162.47, 163.28; MS (EI)  $m/z$  (relative intensity) 360 ( $[\text{M}^+]$ , 1), 345 (1), 303 (45), 227 (16); HRMS (EI)  $m/z$  calcd. for  $\text{C}_{23}\text{H}_{24}\text{N}_2\text{O}_2$  360.1838 found 360.1843;  $[\alpha]_{589}^{25} -140.6$  ( $c$  1.0,  $\text{CH}_2\text{Cl}_2$ ).

**(*S*)-*N*-(1-hydroxy-3-methylbutan-2-yl)-3-phenylpropanamide (15ja)<sup>SI-7</sup>**

purified by flush column chromatography (silica gel, Hexane/EtOAc = 1/4 to 8); white solid (2.42 g, 50% yield); mp

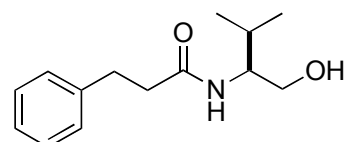

76-79 °C; IR (neat NaCl,  $\nu$ ) 3309, 2934, 2871, 1664, 1465, 1368, 984  $\text{cm}^{-1}$ ;  $^1\text{H}$  NMR (300 MHz,  $\text{CDCl}_3$ , 35 °C)  $\delta$  0.82 (d,  $J = 6.9$  Hz, 3H,  $\text{CH}(\text{CH}_3)_2$ ), 0.87 (d,  $J = 6.9$  Hz, 3H,  $\text{CH}(\text{CH}_3)_2$ ), 1.7–1.9 (m, 1H,  $\text{CH}(\text{CH}_3)_2$ ), 2.52 (t,  $J = 7.5$  Hz, 2H,  $\text{PhCH}_2\text{CH}_2$ ), 2.82 (bs, 1H, OH), 2.96 (t,  $J = 7.5$  Hz, 2H,  $\text{PhCH}_2\text{CH}_2$ ), 3.5–3.7 (m, 3H,  $\text{NCHCH}_2$ ), 5.69 (d,  $J = 7.5$  Hz, 1H, NH), 7.1–7.3 (m, 5H, Ph);  $^{13}\text{C}$  NMR (75 MHz,  $\text{CDCl}_3$ , 35 °C)  $\delta$  18.75, 19.42, 28.95, 31.85, 38.58, 57.08, 63.65, 126.18, 128.21, 128.43, 140.52, 172.82; MS (EI)  $m/z$  (relative intensity) 199 ( $[\text{M}^+]$ , 28), 184 (10), 182 (36), 170 (20), 169 (27), 158 (36), 157 (100); HRMS (EI)  $m/z$  calcd. for  $\text{C}_{11}\text{H}_{21}\text{NO}_2$  199.1572, found 199.1543;  $[\alpha]_{589}^{25} -29.2$  ( $c$  1.0,  $\text{CH}_2\text{Cl}_2$ ).

SI-1) McKennon, M. J.; Meyers, A. I. *J. Org. Chem.* **1993**, *58*, 3568.

SI-2) Viola, P.; Juergen, M. *Chem. Ber.* **1996**, *129*, 691.

SI-3) Wipf, P.; Wang, X. *J. Comb. Chem.* **2002**, *4*, 656.

SI-4) Aoki, K.; Shimada, T.; Hayashi, T. *Tetrahedron: Asymmetry* **2004**, *15*, 1771.

SI-5) Serota, S.; Simon, J. R.; Murray, E. B.; Linfield, W. M. *J. Org. Chem.* **1981**, *46*, 4147.

SI-6) Kurth, M. J.; Decker, O. H. W.; Hope, H.; Yanuck, M. D. *J. Am. Chem. Soc.* **1985**, *107*, 443.

SI-7) Kanomata, N.; Maruyama, S.; Tomono, K.; Anada, S. *Tetrahedron Lett.* **2003**, *44*, 3599.
